# Supplementary material
Source: PubMed Central journal article supplement (PMC7209395)
Supplement: NIHMS1581535-supplement-Supplementary_Data.pdf [file NIHMS1581535-supplement-Supplementary_Data.pdf]

**Current Biology, Volume 30**

## **Supplemental Information**

### **Chromatin Organization in Early Land Plants Reveals an Ancestral Association between H3K27me3, Transposons, and Constitutive Heterochromatin**

**Sean A. Montgomery, Yasuhiro Tanizawa, Bence Galik, Nan Wang, Tasuku Ito, Takako Mochizuki, Svetlana Akimcheva, John L. Bowman, Valérie Cognat, Laurence Maréchal-Drouard, Heinz Ekker, Syuan-Fei Hong, Takayuki Kohchi, Shih-Shun Lin, Li-Yu Daisy Liu, Yasukazu Nakamura, Lia R. Valeeva, Eugene V. Shakirov, Dorothy E. Shippen, Wei-Lun Wei, Masaru Yagura, Shohei Yamaoka, Katsuyuki T. Yamato, Chang Liu, and Frédéric Berger**

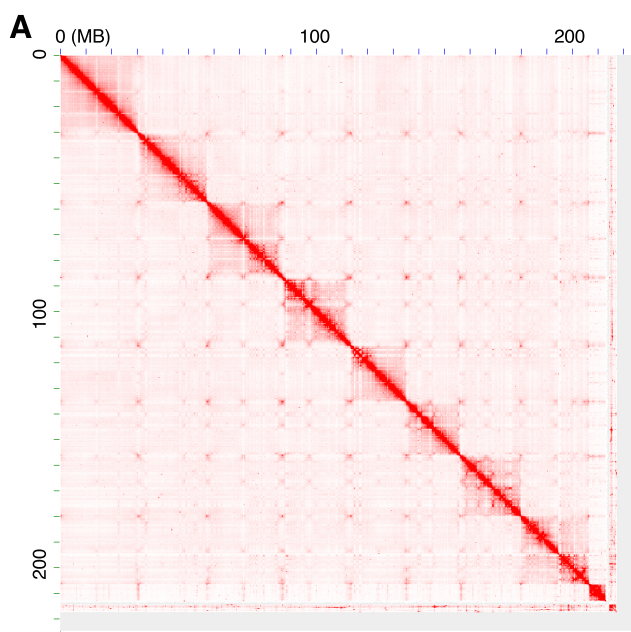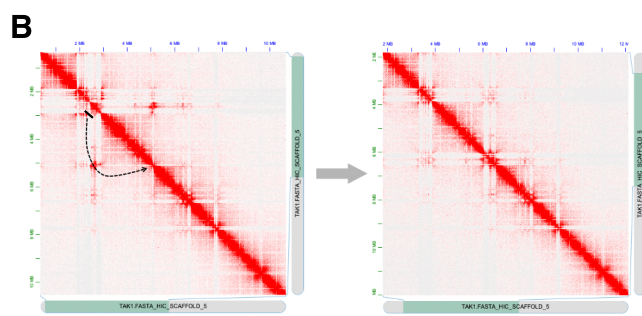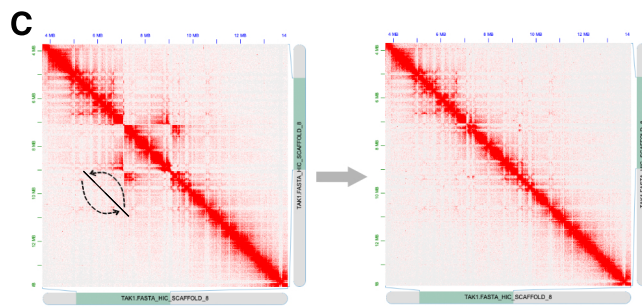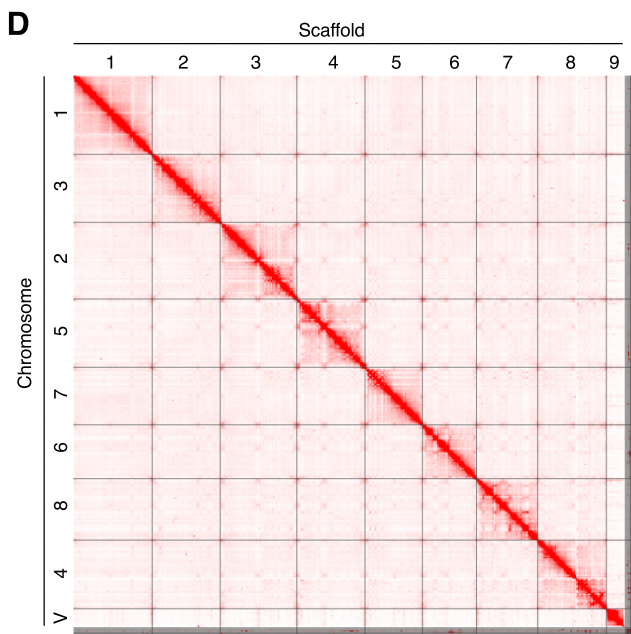

**Figure S1. Hi-C guided assembly of the *Marchantia* Tak-1 genome. Related to STAR Methods.**

(A) Hi-C map of the assembled “super-scaffold”, visualized with Juicebox [S1]. The vast majority of this super-scaffold is consisting of 9 distinct self-interacting blocks.

(B and C) Manual inspection and correction of local misjoins. Panels on right show corrected Hi-C maps. Depending on the nature of aberrant interaction patterns, they can be corrected by changing the order of scaffolds, such as shift (B), inversion (C), or a combination of them.

(D) Hi-C map of the Tak-1 genome with manual correction. The nomenclature of chromosomes 1 to 8 and chromosome V is according to the sizes of the longest assembled 9 scaffolds.

**A**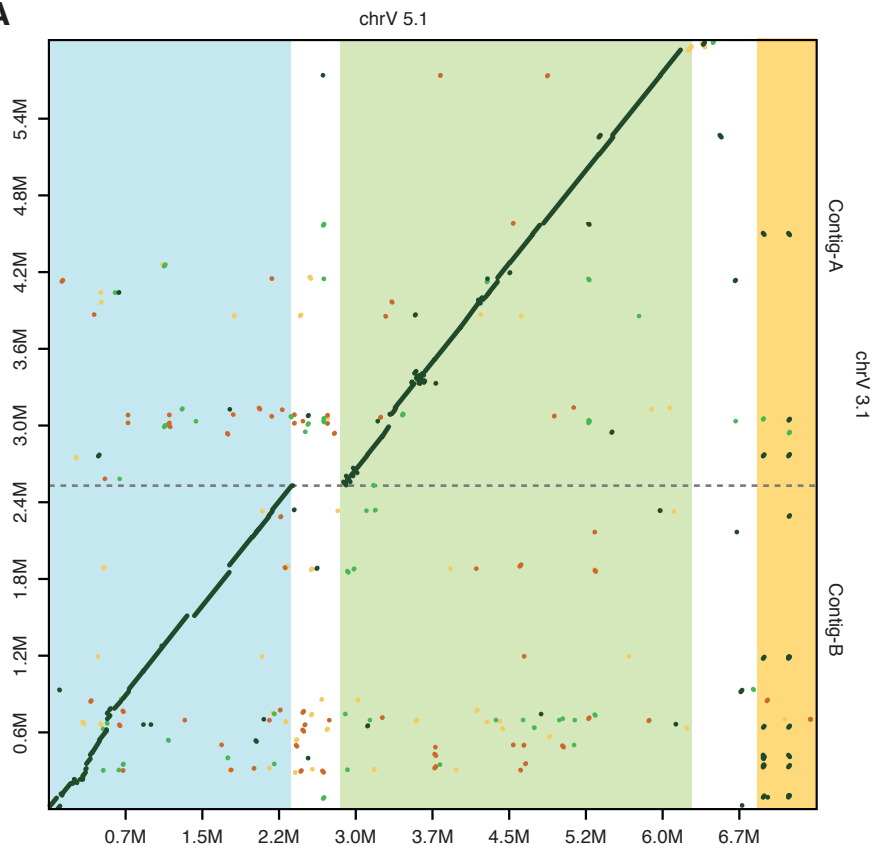**B**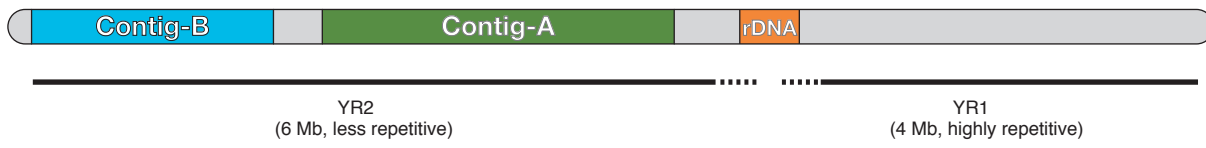

**Figure S2. Chromosome V structure. Related to Figure 5.**

(A) Comparison of the chromosome V sequences from the genome assembly versions 5.1 (this study) and 3.1[S2]. The regions corresponding to those previously sequenced (Contig-A and Contig-B; [S3]) and an rDNA cluster are colored. The rDNA cluster contains 6 copies of rDNA repeat unit, which shows 99.6% and 97.0% similarities to the autosomal and U-chromosomal copies[S4], respectively.

(B) Schematic diagram of the V chromosome structure. The V-chromosomal segments, YR1 and YR2, identified in the previous study [S3] are represented by thick lines. Note that the boundary between YR1 and YR2 is not determined.

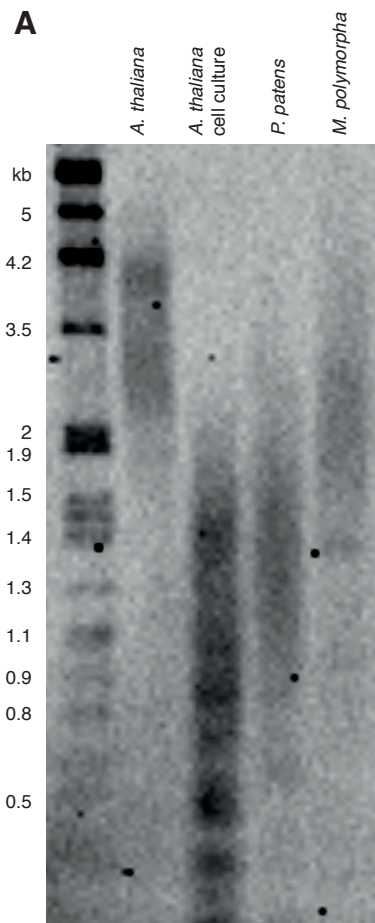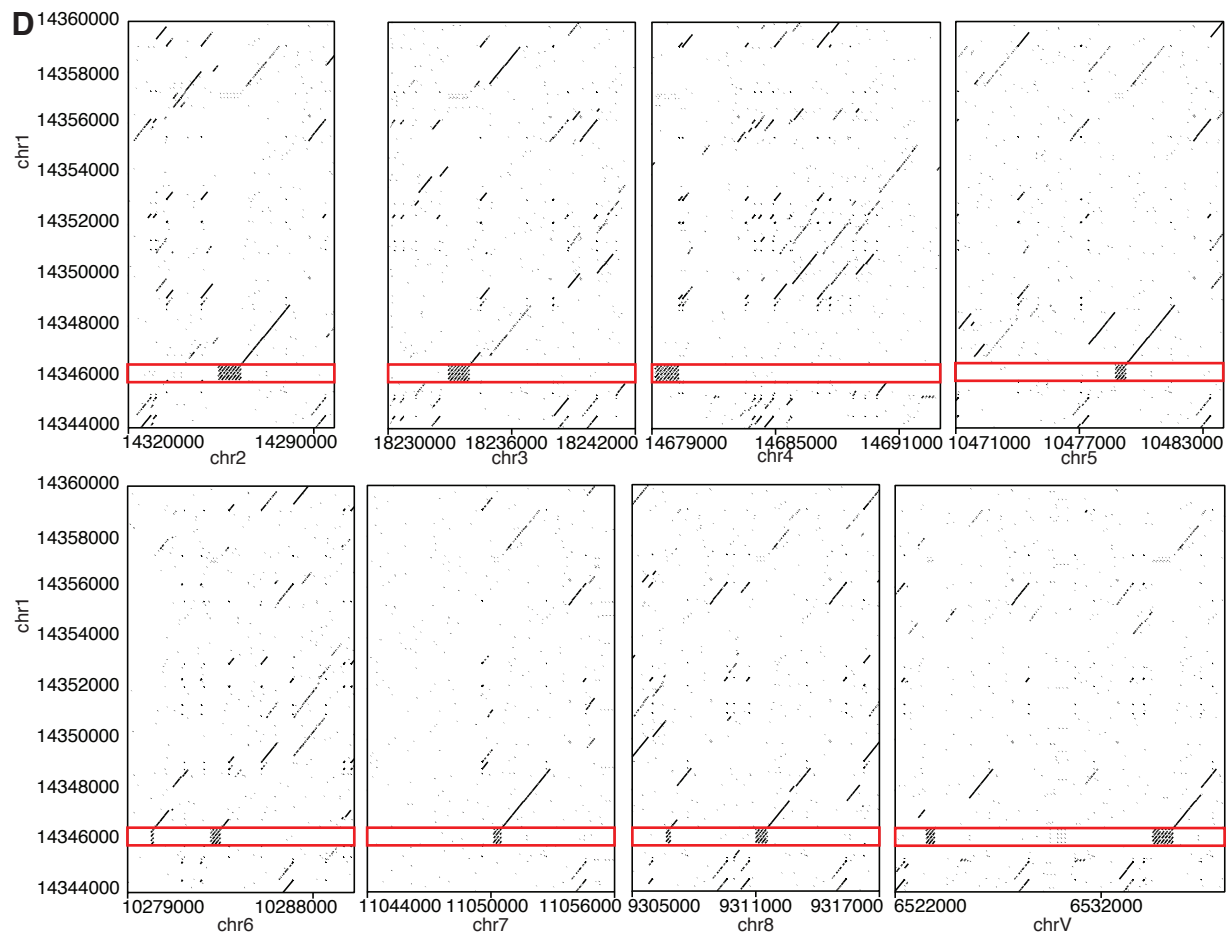

**B** Centromeric repeat

Probe 1  
TGTGGAGTGTCAACAGGAGCTGAGATTTAG **TGGGCTTGTTACGACGGCCGGG**  
**CGCACATACCTGCAAATTTTCAGCCCCAACGGAGCTGCTGTCAAGAAGTTGTCAT**  
**TTCGAAACTTTGAGTTTAAGGTTTGAGCATGAATCTTGCGGGGGCCATATCTTCT**  
 Probe 2

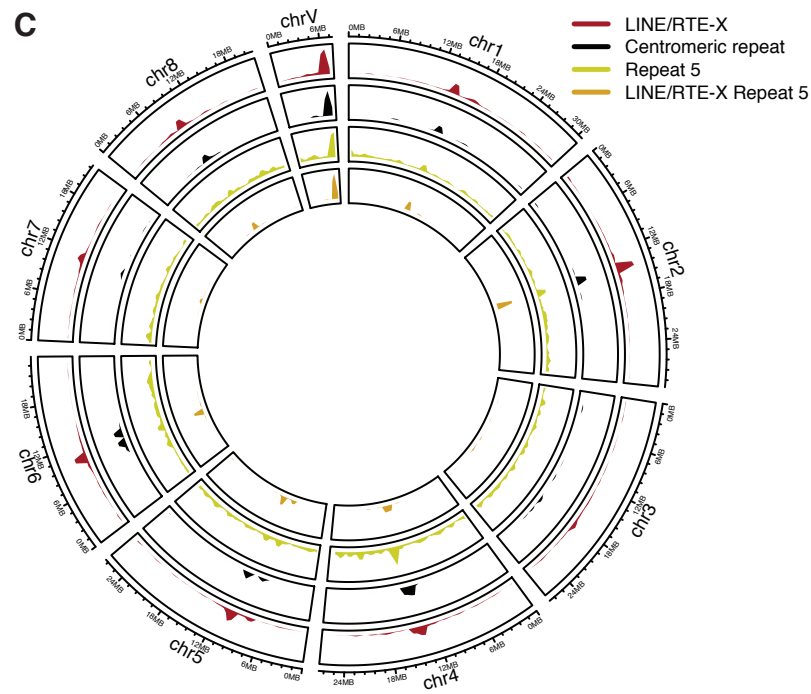

**Figure S3. Centromeres and telomeres in *Marchantia*. Related to Figure 1.**

(A) Comparative TRF (telomere repeat fragment assay, Southern blotting) analysis of DNA isolated from *Arabidopsis thaliana* Col-0 ecotype, *Arabidopsis thaliana* cell culture, *Physcomitrella patens* strain Gransden and *Marchantia polymorpha*. As expected, telomeres in all plants display a heterogeneous profile, but the mean length differs between the species. *M. polymorpha* telomeres (mean TRF 2,058 bp) are shorter than in *A. thaliana* (mean TRF 2,976 bp), but longer than in the model moss *P. patens* (mean TRF 1,443 bp). Telomere lengths of *A. thaliana* cell culture are shorter than in plants. The blot was hybridized with a DIG-labeled (TTTAGGG)<sub>4</sub> probe. Molecular weight markers are shown on the left.

(B) Centromeric repeat sequence. Probes used for FISH experiments are highlighted.

(C) Circos plot of centromere-related feature distributions across the genome. Each band shows the density of each feature per chromosome, relative to the greatest density per band. Centromeric repeat band based on positions of BLAST hits with E-values < 10<sup>-30</sup> using the putative centromeric as a query against the *Marchantia* genome. LINE/RTE-X Repeat 5 band corresponds to all LINE/RTE-X elements belonging to repeat cluster 5.

(D) Dot plots between chromosome 1 and each other chromosome. Putative centromeric repeat is highlighted on chromosome 1. Sequences with a score greater than 50 over 10bp windows appear as dots. Genomic coordinates shown along the x-axis and are the same for chromosome 1 in each plot.

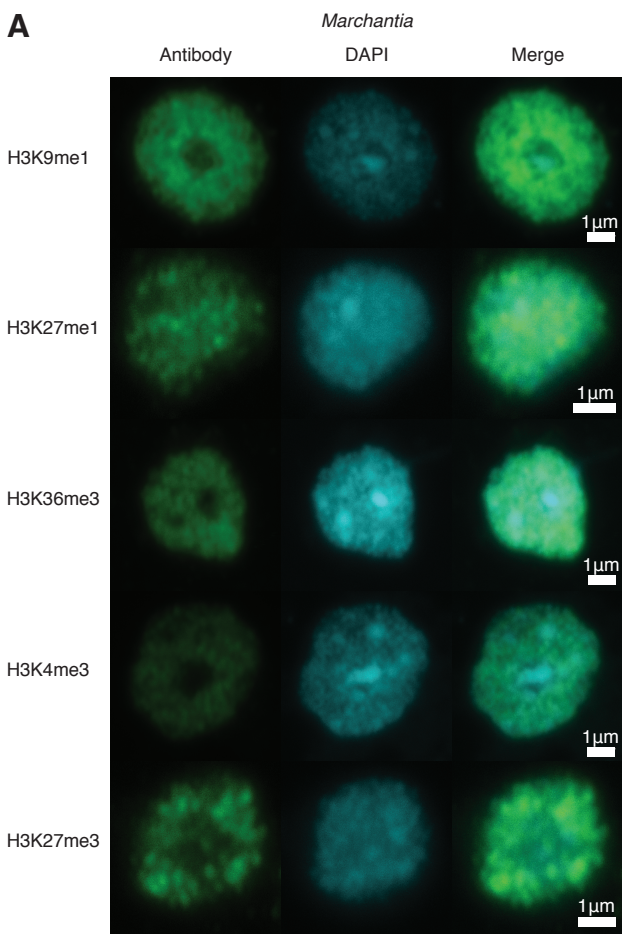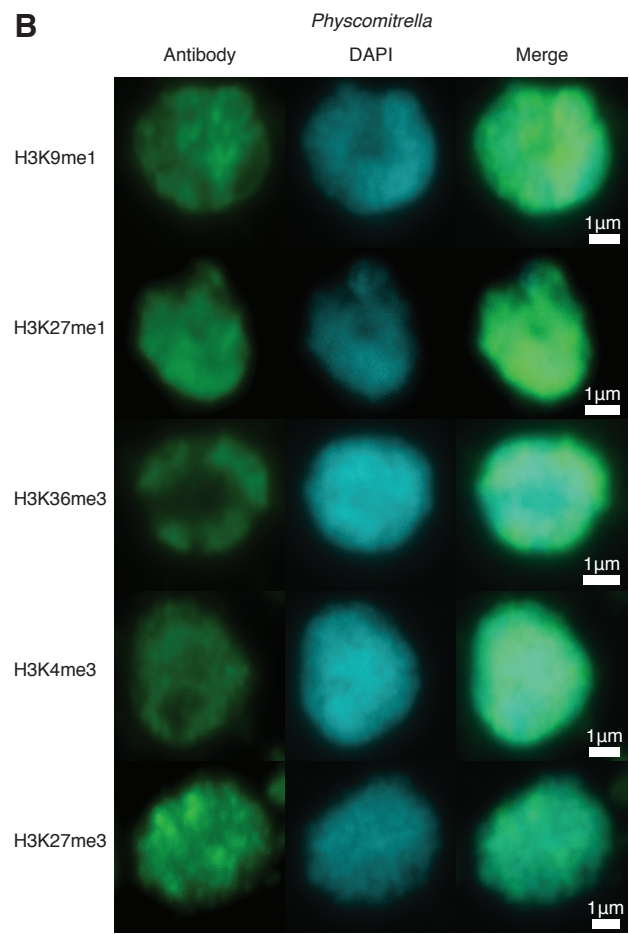



**Figure S4. *Marchantia* and *Physcomitrella* nuclei immunostaining. Related to Figure 1.**

(A) Immunostaining of isolated *Marchantia* nuclei. Green is the indicated chromatin mark. Blue is DAPI-stained DNA.

(B) Immunostaining of isolated *Physcomitrella patens* nuclei. Green is the indicated chromatin mark. Blue is DAPI-stained DNA.

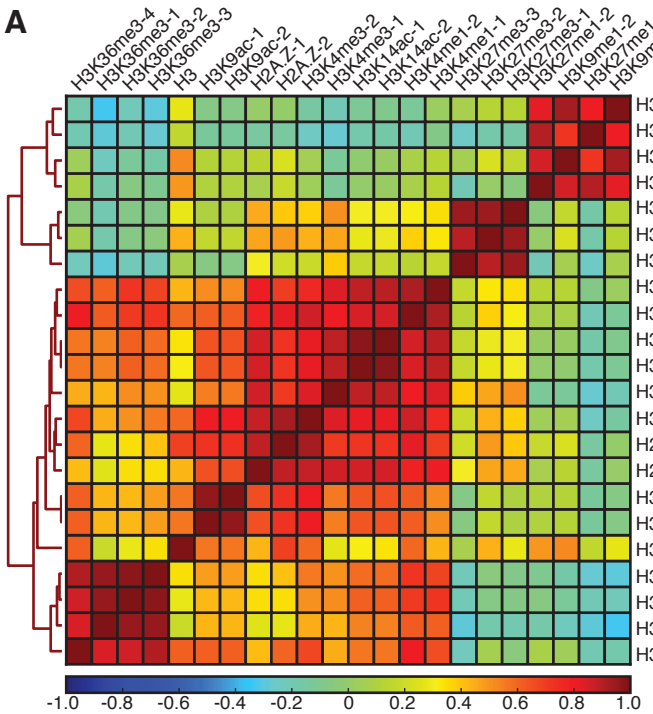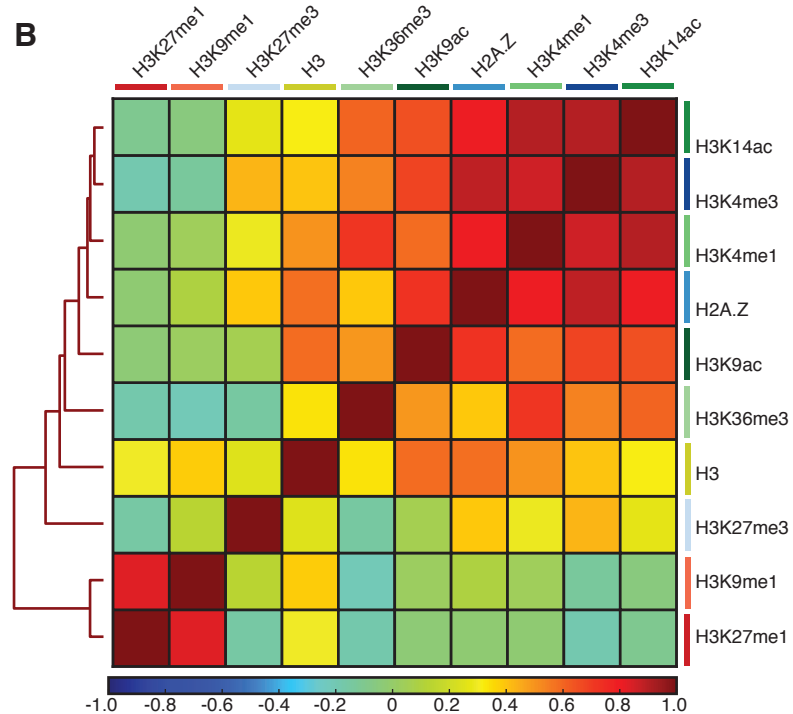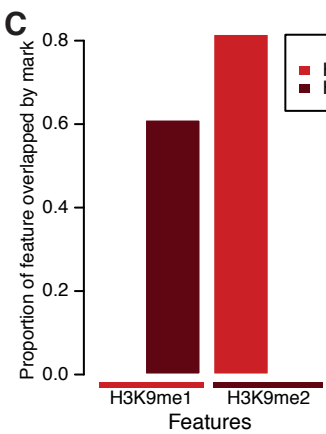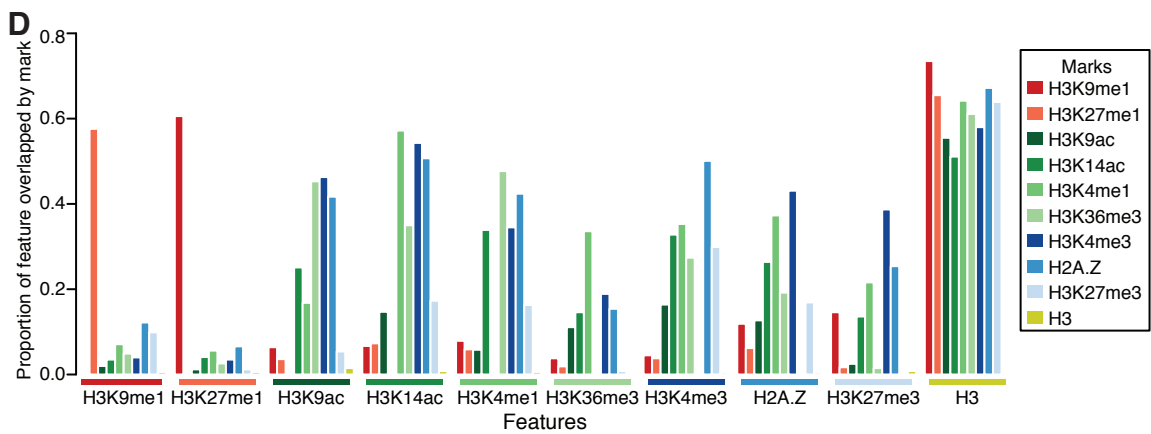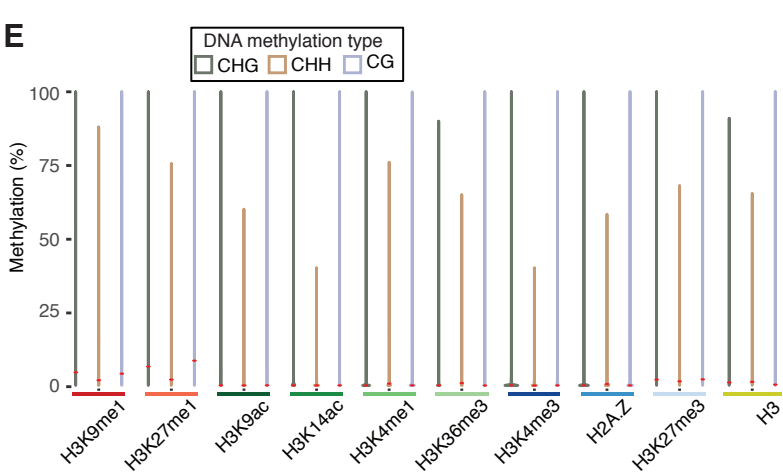

**Figure S5. Distribution of chromatin marks in the *Marchantia* genome. Related to Figures 2, 3 and 4.**

(A) Pearson correlation heatmap of CUT&RUN biological replicates. Colours represent the correlation coefficient, with red for high similarity and blue for low similarity. Hierarchical clustering shown to the left of the heatmap.

(B) Pearson correlation heatmap of merged CUT&RUN samples. Colours represent the correlation coefficient, with red for high similarity and blue for low similarity. Hierarchical clustering shown to the left of the heatmap.

(C) Proportion of H3K9me1 and H3K9me2 peaks overlapping each other in *Arabidopsis*. The total length of overlapping peaks was divided by the total length of feature peaks (x-axis) to determine the proportion of feature lengths overlapped by marks.

(D) Proportion of chromatin mark peaks overlapped by other chromatin mark peaks. The total length of overlapping chromatin mark peaks was divided by the total length of peaks of chromatin marks (features; along x axis) to determine the proportion of feature lengths overlapped by other chromatin marks.

(E) DNA methylation levels over chromatin mark peaks. Methylation percentage calculated per chromatin mark peak. Width relative to density of peaks. Red dots indicate median methylation values.

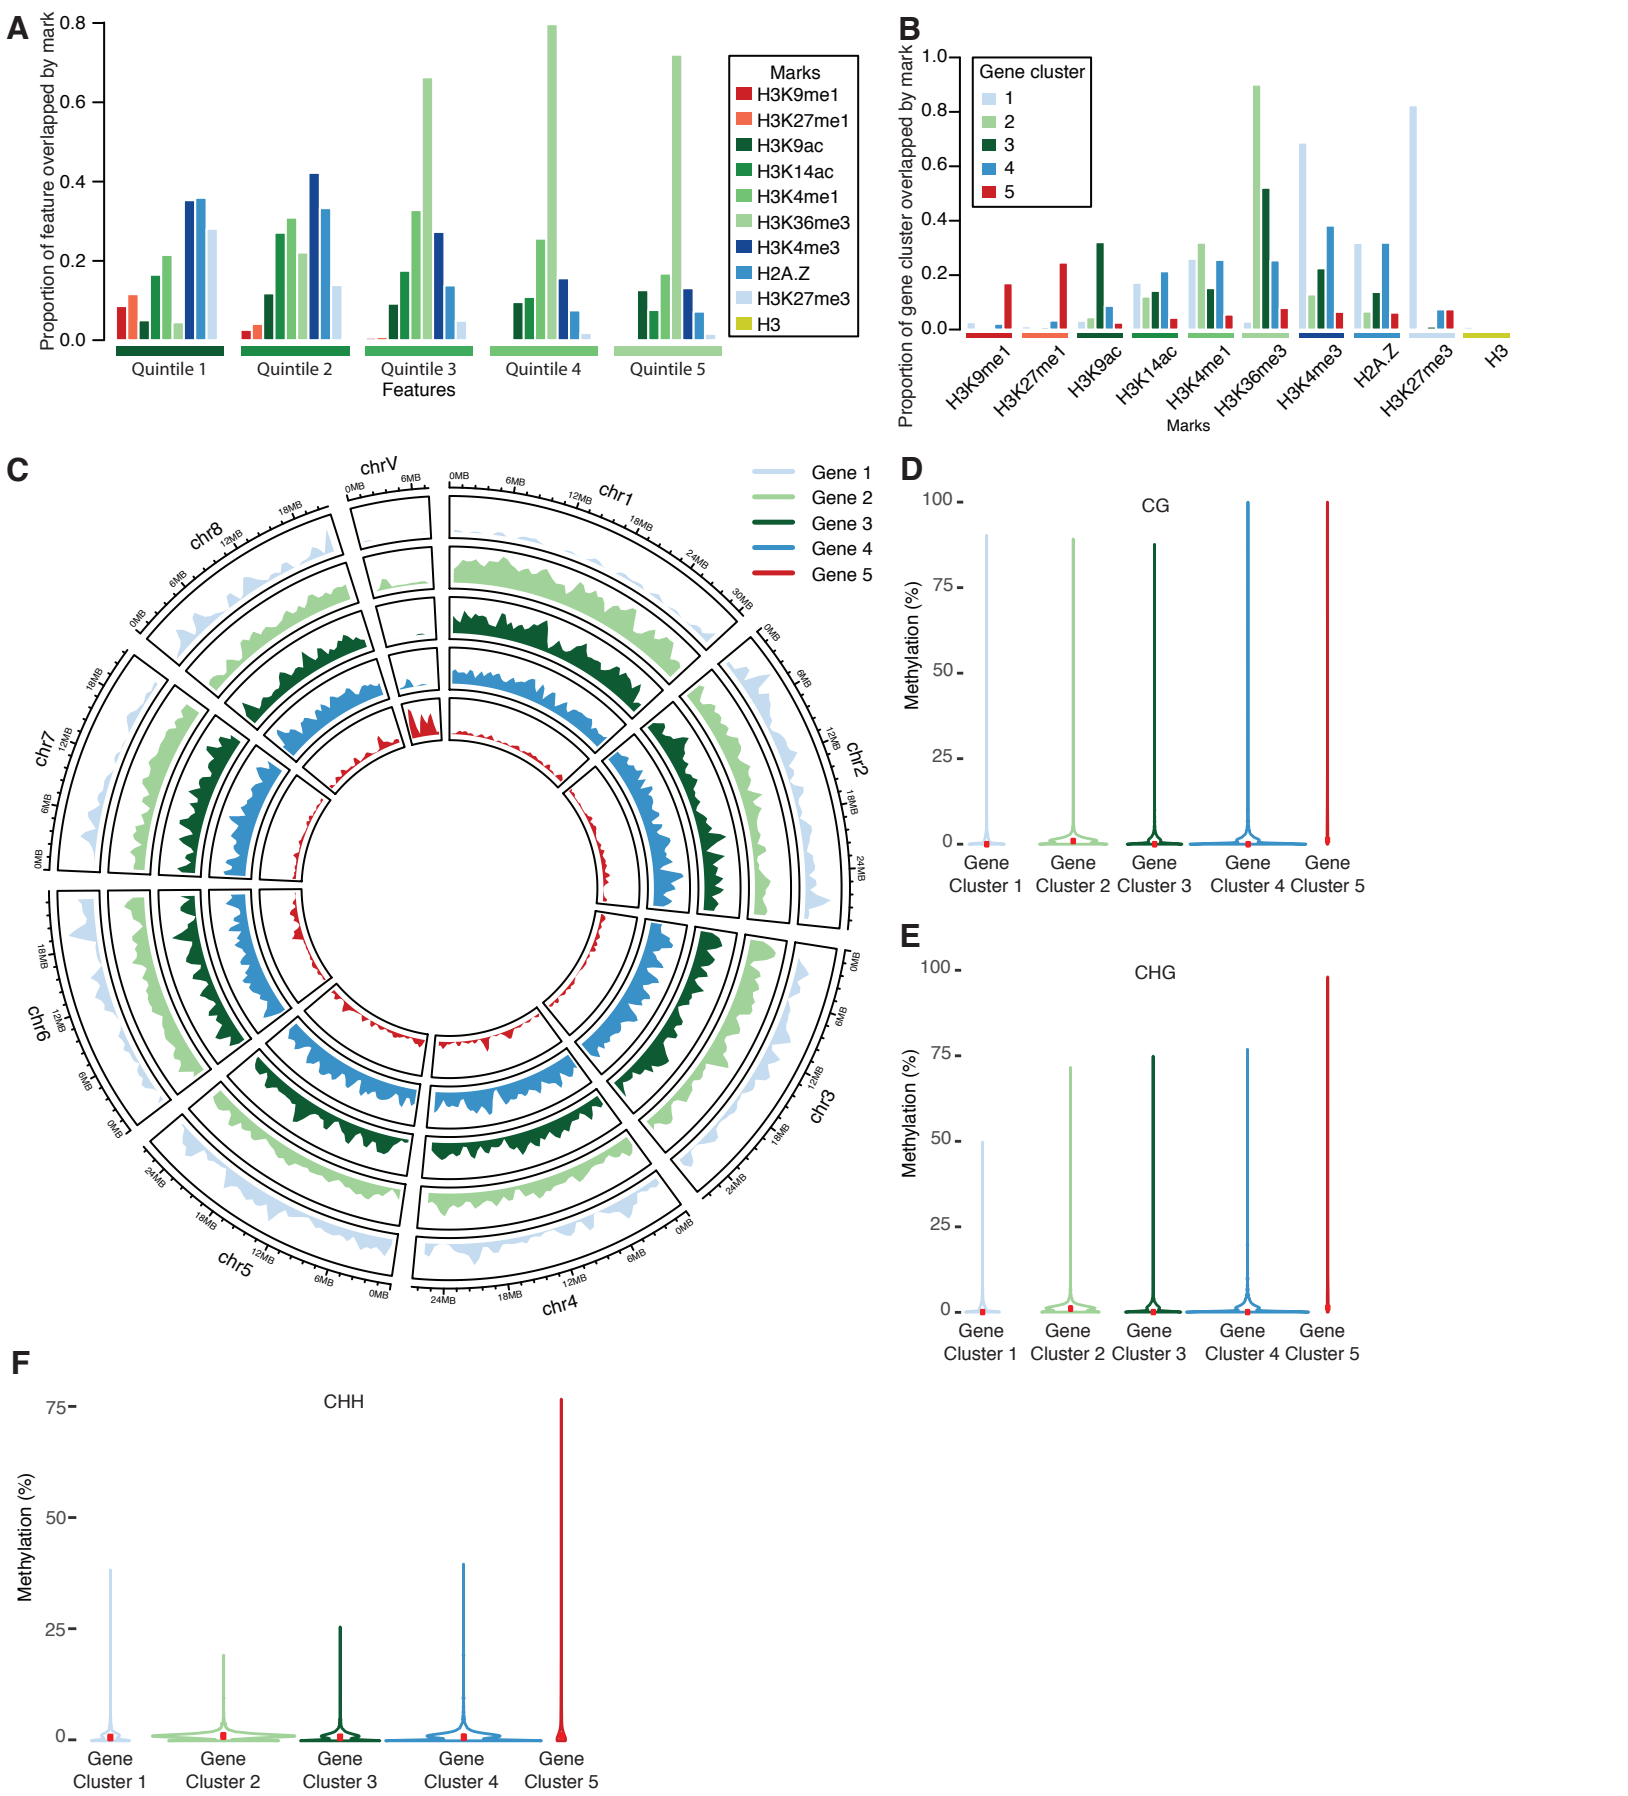

**Figure S6. Association of chromatin marks with genes. Related to Figure 3.**

(A) Proportion of genes per expression quintile overlapped by chromatin mark peaks. The total length of chromatin mark peaks overlapping genes was divided by the total length of genes per quintile to determine each proportion. Quintiles correspond to transcript per million values as follows: 1: 0-0.073; 2: 0.073-2.013; 3: 2.013-12.410; 4: 12.410-33.950; 5: 33.950-23567.63.

(B) Proportion of gene clusters overlapped by chromatin mark peaks. The total length of chromatin mark peaks overlapping genes per gene cluster was divided by the total length of genes per gene cluster to determine each proportion.

(C) Circos plot of gene cluster distribution across the genome. Each band shows the density of genes per gene cluster per chromosome, relative to the greatest density per band.

(D) DNA CG methylation levels of gene clusters. Methylation percentage calculated per gene in each gene cluster. Width relative to density of genes. Red dots indicate median methylation values.

(E) DNA CHG methylation levels of gene clusters. Methylation percentage calculated per gene in each gene cluster. Width relative to density of genes. Red dots indicate median methylation values.

(F) DNA CHH methylation levels of gene clusters. Methylation percentage calculated per gene in each gene cluster. Width relative to density of genes. Red dots indicate median methylation values.

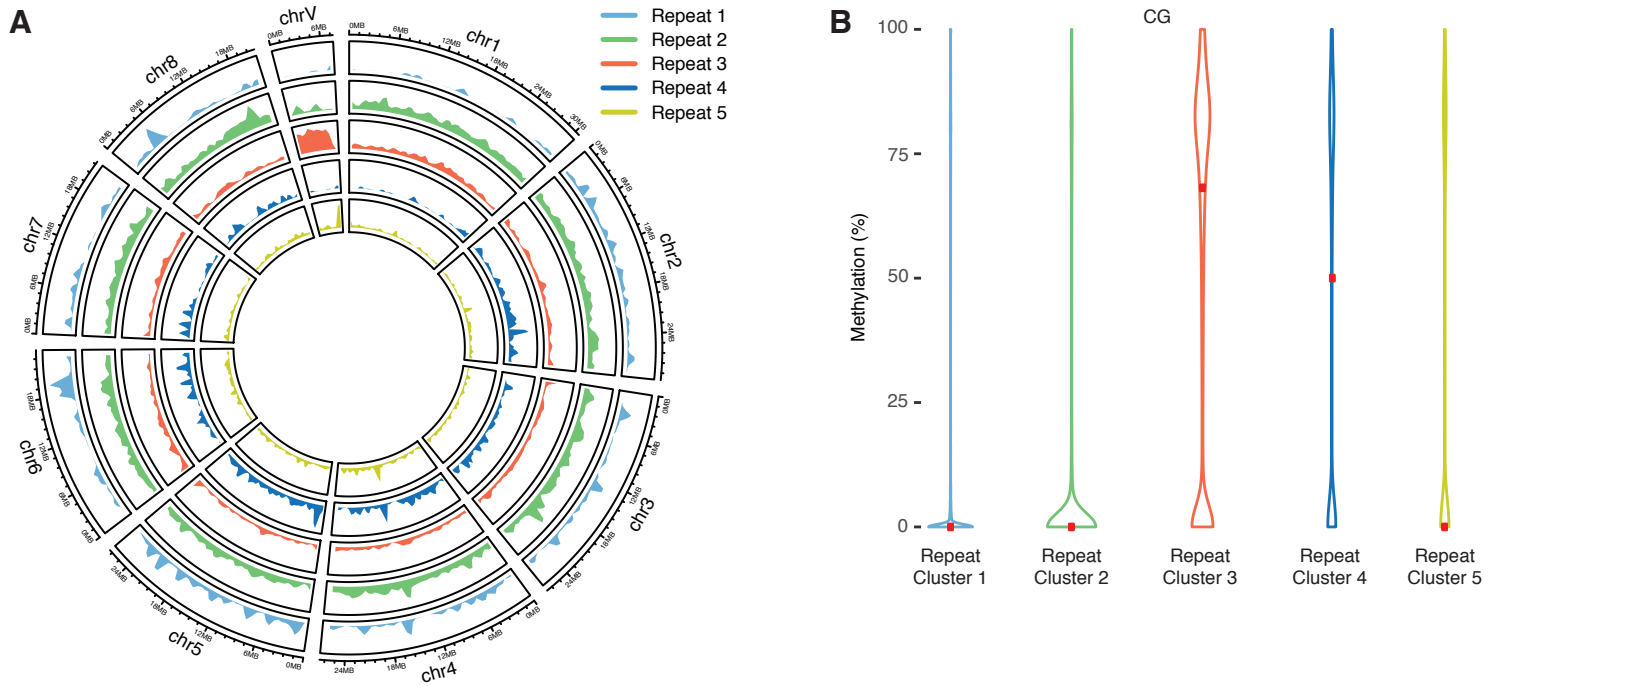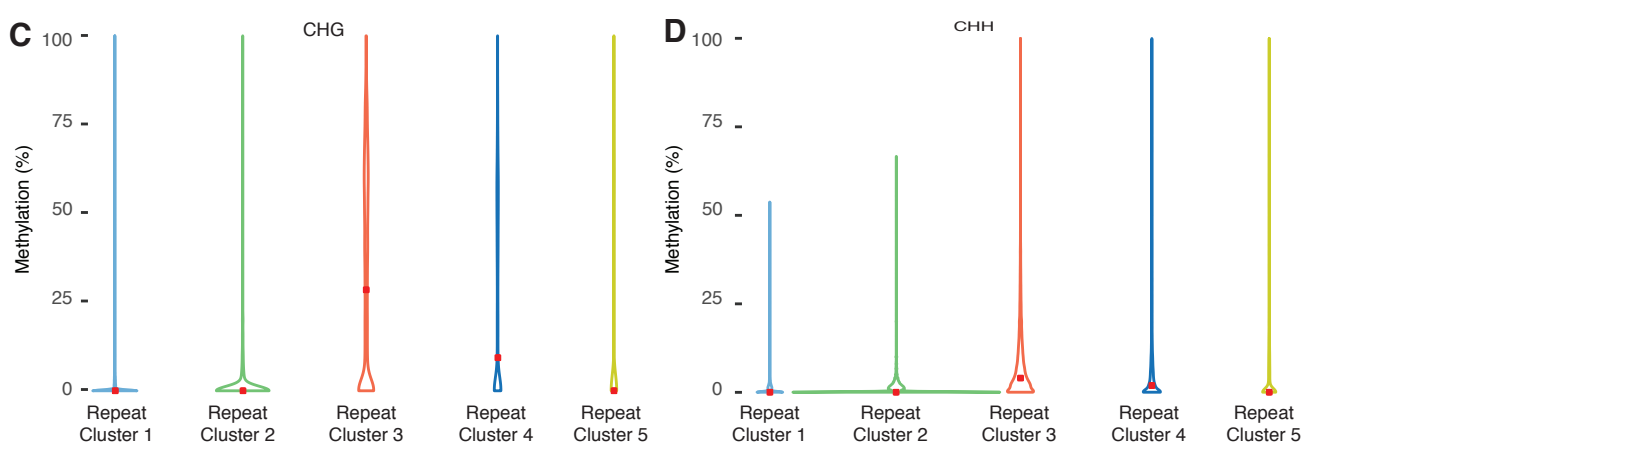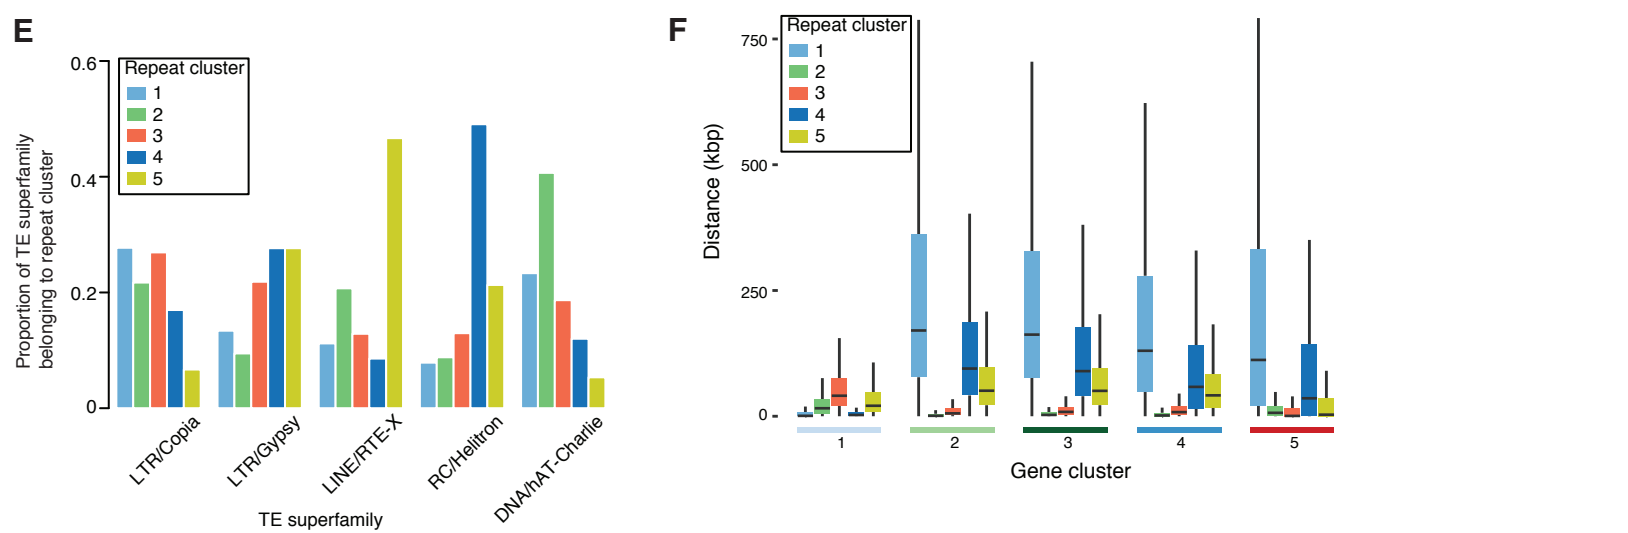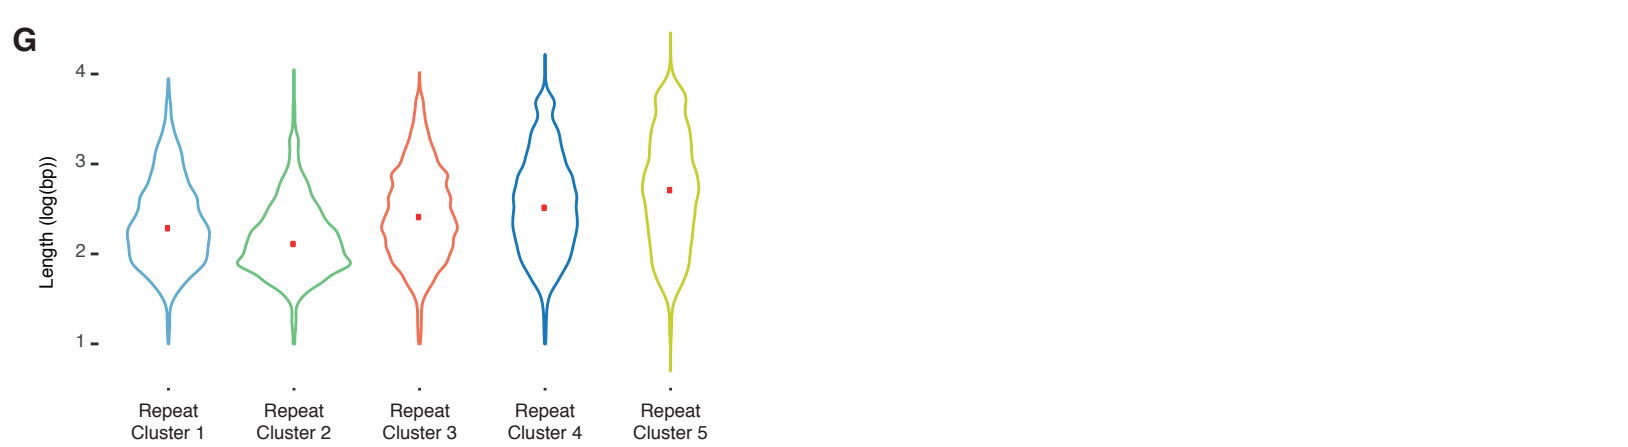

**Figure S7. Association of chromatin marks with transposons. Related to Figure 4.**

(A) Circos plot of repeat cluster distribution across the genome. Each band shows the density of transposons per repeat cluster per chromosome, relative to the greatest density per band.

(B) DNA CG methylation levels of repeat clusters. Methylation percentage calculated per transposon in each repeat cluster. Width relative to density of transposons. Red dots indicate median methylation values.

(C) DNA CHG methylation levels of repeat clusters. Methylation percentage calculated per transposon in each repeat cluster. Width relative to density of transposons. Red dots indicate median methylation values.

(D) DNA CHH methylation levels of repeat clusters. Methylation percentage calculated per transposon in each repeat cluster. Width relative to density of transposons. Red dots indicate median methylation values.

(E) Proportion of transposon superfamily length belonging to repeat clusters. The total length of transposon superfamilies belonging to repeat clusters was divided by the total length each repeat cluster and scaled per transposon superfamily to determine each proportion.

(F) Boxplot of distances between each gene and the nearest transposon per repeat cluster. Briefly each gene is compared to all transposons belonging to a repeat cluster to find its nearest neighbor. Genes are divided based on the gene cluster they belong to. Distances in kilobases (kbp). Coloured boxes represent interquartile range and lines represent median values. Outliers not shown.

(G) Length of repeats per cluster in log scale. Width relative to density of genes. Red dots indicate median lengths of repeats per cluster.

| Sample          | Total reads sequenced | Total mapped reads | Total mapped reads after removing PCR duplicates | Total Hi-C reads after filtering |
|-----------------|-----------------------|--------------------|--------------------------------------------------|----------------------------------|
| Tak-1 Hi-C rep1 | 111916105             | 70619675           | 60276489                                         | 48658854                         |
| Tak-1 Hi-C rep2 | 133115486             | 81254888           | 50779358                                         | 41369547                         |

**Table S2. Statistics related to Hi-C data. Related to STAR Methods.**



## Supplemental References

[S1] Robinson, J.T., Turner, D., Durand, N.C., Thorvaldsdóttir, H., Mesirov, J.P., and Aiden, E.L. (2018). Juicebox.js Provides a Cloud-Based Visualization System for Hi-C Data. *Cell Systems* 6, 256-258 e1.

[S2] Bowman, J.L., Kohchi, T., Yamato, K.T., Jenkins, J., Shu, S., Ishizaki, K., Yamaoka, S., Nishihama, R., Nakamura, Y., Berger, F., et al. (2017). Insights into Land Plant Evolution Garnered from the *Marchantia polymorpha* Genome. *Cell* 171, 287-304 e215.

[S3] Yamato, K.T., Ishizaki, K., Fujisawa, M., Okada, S., Nakayama, S., Fujishita, M., Bando, H., Yodoya, K., Hayashi, K., Bando, T., et al. (2007). Gene organization of the liverwort Y chromosome reveals distinct sex chromosome evolution in a haploid system. *Proc Natl Acad Sci U S A* 104, 6472-6477.

[S4] Fujisawa, M., Nakayama, S., Nishio, T., Fujishita, M., Hayashi, K., Ishizaki, K., Kajikawa, M., Yamato, K.T., Fukuzawa, H., and Ohyama, K. (2003). Evolution of ribosomal DNA unit on the X chromosome independent of autosomal units in the liverwort *Marchantia polymorpha*. *Chromosome research : an international journal on the molecular, supramolecular and evolutionary aspects of chromosome biology* 11, 695-703.
